# Supplementary material for: Ligand-receptor pair-based signature score Derived from On-treatment Tumor Specimens Predicts Immune Checkpoint Blockade Response in Metastatic Melanoma
Source: Research Square preprint supplement (doi:10.21203/rs.3.rs-5854916/v1), 2025-04-17
Supplement: Supplementary file 1 [file 8c68bfac81172e9ae03b1f69.xlsx]

## Sheet: Supplementary Table 1
Supplementary Table 1. Gene list of LPRS.
Ligand-receptor pair	Gene
ALCAM_ALCAM	ALCAM
ALCAM_CD6	CD6
ALCAM_CD6	ALCAM
APLP2_PIGR	PIGR
APLP2_PIGR	APLP2
APP_CD74	CD74
APP_CD74	APP
APP_LRP10	LRP10
APP_LRP10	APP
BST2_LILRA4	LILRA4
BST2_LILRA4	BST2
BTLA_TNFRSF14	TNFRSF14
BTLA_TNFRSF14	BTLA
CADM1_CADM1	CADM1
CADM1_CRTAM	CRTAM
CADM1_CRTAM	CADM1
CD160_TNFRSF14	TNFRSF14
CD160_TNFRSF14	CD160
CD1B_B2M_IL6ST	IL6ST
CD1B_B2M_IL6ST	CD1B
CD1B_B2M_IL6ST	B2M
CD1D_B2M_CEACAM5	CEACAM5
CD1D_B2M_CEACAM5	CD1D
CD1D_B2M_CEACAM5	B2M
CD1D_B2M_LILRB2	LILRB2
CD1D_B2M_LILRB2	CD1D
CD1D_B2M_LILRB2	B2M
CD2_CD48	CD48
CD2_CD48	CD2
CD2_CD58	CD58
CD2_CD58	CD2
CD200_CD200R1	CD200R1
CD200_CD200R1	CD200
CD209_CEACAM1	CEACAM1
CD209_CEACAM1	CD209
CD209_ICAM3	ICAM3
CD209_ICAM3	CD209
CD22_PTPRC	PTPRC
CD22_PTPRC	CD22
CD226_PVR	PVR
CD226_PVR	CD226
CD244_CD48	CD48
CD244_CD48	CD244
CD248_IL6R	IL6R
CD248_IL6R	CD248
CD27_CD70	CD70
CD27_CD70	CD27
CD274_CD80	CD80
CD274_CD80	CD274
CD274_PDCD1	PDCD1
CD274_PDCD1	CD274
CD28_CD80	CD80
CD28_CD80	CD28
CD28_CD86	CD86
CD28_CD86	CD28
CD300LF_CD300LF	CD300LF
CD300LF_CD300LF	CD300LF
CD34_SELL	SELL
CD34_SELL	CD34
CD34_SELP	SELP
CD34_SELP	CD34
CD40_CD40LG	CD40LG
CD40_CD40LG	CD40
CD40LG_ITGA2B_ITGB3	ITGB3
CD40LG_ITGA2B_ITGB3	ITGA2B
CD40LG_ITGA2B_ITGB3	CD40LG
CD40LG_ITGA5_ITGB1	ITGB1
CD40LG_ITGA5_ITGB1	ITGA5
CD40LG_ITGA5_ITGB1	CD40LG
CD44_SELE	SELE
CD44_SELE	CD44
CD46_JAG1	JAG1
CD46_JAG1	CD46
CD47_SIRPA	SIRPA
CD47_SIRPA	CD47
CD47_SIRPG	SIRPG
CD47_SIRPG	CD47
CD5_CD5	CD5
CD52_SIGLEC10	SIGLEC10
CD52_SIGLEC10	CD52
CD72_SEMA4D	SEMA4D
CD72_SEMA4D	CD72
CD80_CTLA4	CTLA4
CD80_CTLA4	CD80
CD80_NGFR	NGFR
CD80_NGFR	CD80
CD84_CD84	CD84
CD86_CTLA4	CTLA4
CD86_CTLA4	CD86
CD8A_CEACAM5	CEACAM5
CD8A_CEACAM5	CD8A
CD8B_CD8A_CEACAM5	CEACAM5
CD8B_CD8A_CEACAM5	CD8B
CD8B_CD8A_CEACAM5	CD8A
CD93_IFNGR1	IFNGR1
CD93_IFNGR1	CD93
CD96_PVR	PVR
CD96_PVR	CD96
CDH1_CDH1	CDH1
CDH1_ITGA2_ITGB1	ITGA2
CDH1_ITGA2_ITGB1	ITGB1
CDH1_ITGA2_ITGB1	CDH1
CDH1_KLRG1	KLRG1
CDH1_KLRG1	CDH1
CDH2_FCER2	FCER2
CDH2_FCER2	CDH2
CEACAM1_CEACAM1	CEACAM1
CEACAM1_CEACAM1	CEACAM1
CEACAM1_CEACAM5	CEACAM5
CEACAM1_CEACAM5	CEACAM1
CEACAM1_CEACAM6	CEACAM6
CEACAM1_CEACAM6	CEACAM1
CEACAM1_CEACAM8	CEACAM8
CEACAM1_CEACAM8	CEACAM1
CEACAM1_SELE	SELE
CEACAM1_SELE	CEACAM1
CEACAM6_CEACAM6	CEACAM6
CEACAM6_CEACAM8	CEACAM8
CEACAM6_CEACAM8	CEACAM6
CHL1_CHL1	CHL1
CHL1_CHL1	CHL1
CHL1_L1CAM	L1CAM
CHL1_L1CAM	CHL1
CLEC2B_KLRF1	KLRF1
CLEC2B_KLRF1	CLEC2B
CLEC2D_KLRB1	KLRB1
CLEC2D_KLRB1	CLEC2D
CNTN1_MCAM	MCAM
CNTN1_MCAM	CNTN1
CNTN1_NRCAM	NRCAM
CNTN1_NRCAM	CNTN1
CR2_FCER2	FCER2
CR2_FCER2	CR2
CSF1_CSF1R	CSF1R
CSF1_CSF1R	CSF1
DLL1_FCRL1	FCRL1
DLL1_FCRL1	DLL1
DSC1_DSG1	DSG1
DSC1_DSG1	DSC1
DSC1_DSG2	DSG2
DSC1_DSG2	DSC1
DSC2_DSG1	DSG1
DSC2_DSG1	DSC2
DSC2_DSG2	DSG2
DSC2_DSG2	DSC2
DSC3_DSG1	DSG1
DSC3_DSG1	DSC3
DSC3_DSG2	DSG2
DSC3_DSG2	DSC3
EFNB1_EPHA2	EPHA2
EFNB1_EPHA2	EFNB1
EFNB1_EPHA4	EPHA4
EFNB1_EPHA4	EFNB1
EFNB1_EPHB1	EPHB1
EFNB1_EPHB1	EFNB1
EFNB1_EPHB2	EPHB2
EFNB1_EPHB2	EFNB1
ESAM_ESAM	ESAM
ESAM_ESAM	ESAM
F11R_F11R	F11R
F11R_ITGAL_ITGB2	ITGB2
F11R_ITGAL_ITGB2	ITGAL
F11R_ITGAL_ITGB2	F11R
FAS_FASLG	FASLG
FAS_FASLG	FAS
FCER2_FGFR2	FGFR2
FCER2_FGFR2	FCER2
FCER2_ITGAM_ITGB2	ITGB2
FCER2_ITGAM_ITGB2	ITGAM
FCER2_ITGAM_ITGB2	FCER2
FCER2_ITGAV_ITGB3	ITGB3
FCER2_ITGAV_ITGB3	ITGAV
FCER2_ITGAV_ITGB3	FCER2
FCER2_ITGAX_ITGB2	ITGB2
FCER2_ITGAX_ITGB2	ITGAX
FCER2_ITGAX_ITGB2	FCER2
FGFR1_NCAM1	NCAM1
FGFR1_NCAM1	FGFR1
FGFR4_SDC2	SDC2
FGFR4_SDC2	FGFR4
FGFR4_TGFBR3	TGFBR3
FGFR4_TGFBR3	FGFR4
FLT3_FLT3LG	FLT3LG
FLT3_FLT3LG	FLT3
HFE_B2M_TFRC	TFRC
HFE_B2M_TFRC	HFE
HFE_B2M_TFRC	B2M
HLA_E_B2M_KLRC1_KLRD1	KLRC1
HLA_E_B2M_KLRC1_KLRD1	HLA-E
HLA_E_B2M_KLRC2_KLRD1	KLRD1
HLA_E_B2M_KLRC2_KLRD1	B2M
HLA_F_B2M_KIR3DL1	KIR3DL1
HLA_F_B2M_KIR3DL1	HLA-F
HLA_F_B2M_KIR3DL1	B2M
HLA_F_B2M_KIR3DL2	KIR3DL2
HLA_F_B2M_KIR3DL2	HLA-F
HLA_F_B2M_KIR3DL2	B2M
HLA_F_B2M_LILRB1	LILRB1
HLA_F_B2M_LILRB1	HLA-F
HLA_F_B2M_LILRB1	B2M
HLA_F_B2M_LILRB2	LILRB2
HLA_F_B2M_LILRB2	HLA-F
HLA_F_B2M_LILRB2	B2M
HLA_G_B2M_LILRB1	LILRB1
HLA_G_B2M_LILRB1	HLA-G
HLA_G_B2M_LILRB1	B2M
HLA_G_B2M_LILRB2	LILRB2
HLA_G_B2M_LILRB2	HLA-G
HLA_G_B2M_LILRB2	B2M
HLA-F_KIR3DL1	KIR3DL1
HLA-F_KIR3DL1	HLA-F
HLA-F_KIR3DL2	KIR3DL2
HLA-F_KIR3DL2	HLA-F
HLA-G_LILRB1	LILRB1
HLA-G_LILRB1	HLA-G
HLA-G_LILRB2	LILRB2
HLA-G_LILRB2	HLA-G
ICAM1_ITGAL_ITGB2	ITGB2
ICAM1_ITGAL_ITGB2	ITGAL
ICAM1_ITGAL_ITGB2	ICAM1
ICAM1_ITGAM_ITGB2	ITGB2
ICAM1_ITGAM_ITGB2	ITGAM
ICAM1_ITGAM_ITGB2	ICAM1
ICAM1_ITGAX_ITGB2	ITGB2
ICAM1_ITGAX_ITGB2	ITGAX
ICAM1_ITGAX_ITGB2	ICAM1
ICAM1_SPN	SPN
ICAM1_SPN	ICAM1
ICAM2_ITGAL_ITGB2	ITGB2
ICAM2_ITGAL_ITGB2	ITGAL
ICAM2_ITGAL_ITGB2	ICAM2
ICAM3_ITGAD_ITGB2	ITGB2
ICAM3_ITGAD_ITGB2	ITGAD
ICAM3_ITGAD_ITGB2	ICAM3
ICAM3_ITGAL_ITGB2	ITGB2
ICAM3_ITGAL_ITGB2	ITGAL
ICAM3_ITGAL_ITGB2	ICAM3
ICAM4_ITGAL_ITGB2	ITGB2
ICAM4_ITGAL_ITGB2	ITGAL
ICAM4_ITGAL_ITGB2	ICAM4
IL1RAP_PTPRF	PTPRF
IL1RAP_PTPRF	IL1RAP
ITGA2_ITGB1_LAIR1	LAIR1
ITGA2_ITGB1_LAIR1	ITGB1
ITGA2_ITGB1_LAIR1	ITGA2
ITGA2_ITGB1_OSCAR	OSCAR
ITGA2_ITGB1_OSCAR	ITGB1
ITGA2_ITGB1_OSCAR	ITGA2
ITGA4_ITGB1_JAM2	JAM2
ITGA4_ITGB1_JAM2	ITGB1
ITGA4_ITGB1_JAM2	ITGA4
ITGA4_ITGB1_PLAUR	PLAUR
ITGA4_ITGB1_PLAUR	ITGB1
ITGA4_ITGB1_PLAUR	ITGA4
ITGA4_ITGB1_VCAM1	VCAM1
ITGA4_ITGB1_VCAM1	ITGB1
ITGA4_ITGB1_VCAM1	ITGA4
ITGA4_ITGB7_VCAM1	VCAM1
ITGA4_ITGB7_VCAM1	ITGA4
ITGA4_ITGB7_VCAM1	ITGA4
ITGA5_ITGB1_L1CAM	L1CAM
ITGA5_ITGB1_L1CAM	ITGB1
ITGA5_ITGB1_L1CAM	ITGA5
ITGAD_ITGB2_VCAM1	VCAM1
ITGAD_ITGB2_VCAM1	ITGB2
ITGAD_ITGB2_VCAM1	ITGAD
ITGAM_ITGB2_JAM3	JAM3
ITGAM_ITGB2_JAM3	ITGB2
ITGAM_ITGB2_JAM3	ITGAM
ITGAM_ITGB2_THY1	THY1
ITGAM_ITGB2_THY1	ITGB2
ITGAM_ITGB2_THY1	ITGAM
ITGAV_ITGB3_L1CAM	L1CAM
ITGAV_ITGB3_L1CAM	ITGB3
ITGAV_ITGB3_L1CAM	ITGAV
ITGAV_ITGB3_PLAUR	PLAUR
ITGAV_ITGB3_PLAUR	ITGB3
ITGAV_ITGB3_PLAUR	ITGAV
ITGAV_ITGB3_THY1	THY1
ITGAV_ITGB3_THY1	ITGB3
ITGAV_ITGB3_THY1	ITGAV
ITGAX_ITGB2_THY1	THY1
ITGAX_ITGB2_THY1	ITGB2
ITGAX_ITGB2_THY1	ITGAX
JAG1_VASN	VASN
JAG1_VASN	JAG1
JAG2_VASN	VASN
JAG2_VASN	JAG2
JAM2_JAM2	JAM2
JAM2_JAM2	JAM2
JAM2_JAM3	JAM3
JAM2_JAM3	JAM2
JAM3_JAM3	JAM3
JAM3_JAM3	JAM3
L1CAM_L1CAM	L1CAM
L1CAM_L1CAM	L1CAM
LAIR1_LAIR1	LAIR1
LAIR1_LAIR1	LAIR1
LAIR1_LILRB4	LILRB4
LAIR1_LILRB4	LAIR1
LY9_LY9	LY9
LY9_LY9	LY9
MCAM_PTGFRN	PTGFRN
MCAM_PTGFRN	MCAM
MPZL1_MPZL1	MPZL1
MPZL1_MPZL1	MPZL1
NCAM1_NCAM1	NCAM1
NCAM1_NCAM1	NCAM1
NCR1_TMEM106B	TMEM106B
NCR1_TMEM106B	NCR1
OLR1_SLITRK4	SLITRK4
OLR1_SLITRK4	OLR1
PDCD1LG2 _PDCD1	PDCD1
PDCD1LG2 _PDCD1	PDCD1LG2
PI16_TNFRSF21	TNFRSF21
PI16_TNFRSF21	PI16
PLXNB2_SEMA4C	SEMA4C
PLXNB2_SEMA4C	PLXNB2
PLXNB2_SEMA4D	SEMA4D
PLXNB2_SEMA4D	PLXNB2
PLXNB3_SEMA4D	SEMA4D
PLXNB3_SEMA4D	PLXNB3
PLXNC1_SEMA7A	SEMA7A
PLXNC1_SEMA7A	PLXNC1
PLXND1_SEMA4A	SEMA4A
PLXND1_SEMA4A	PLXND1
PODXL_SELL	SELL
PODXL_SELL	PODXL
PVR_TIGIT	TIGIT
PVR_TIGIT	PVR
SELE_SELE	SELE
SELE_SELE	SELE
SELE_SELPLG	SELPLG
SELE_SELPLG	SELE
SELL_SELPLG	SELPLG
SELL_SELPLG	SELL
SELP_SELPLG	SELPLG
SELP_SELPLG	SELP
SIGLEC1_SPN	SPN
SIGLEC1_SPN	SIGLEC1
SLAMF1_SLAMF1	SLAMF1
SLAMF1_SLAMF1	SLAMF1
SLAMF6_SLAMF6	SLAMF6
SLAMF6_SLAMF6	SLAMF6
SLAMF7_SLAMF7	SLAMF7
SLAMF7_SLAMF7	SLAMF7
SLAMF8_SLAMF8	SLAMF8
SLAMF8_SLAMF8	SLAMF8
TNF_TNFRSF1A	TNFRSF1A
TNF_TNFRSF1A	TNF
TNF_TNFRSF1B	TNFRSF1B
TNF_TNFRSF1B	TNF
TNFRSF10A_TNFSF10	TNFSF10
TNFRSF10A_TNFSF10	TNFRSF10A
TNFRSF10C_TNFSF10	TNFSF10
TNFRSF10C_TNFSF10	TNFRSF10C
TNFRSF13B_TNFSF13	TNFSF13
TNFRSF13B_TNFSF13	TNFRSF13B
TNFRSF13B_TNFSF13B	TNFSF13B
TNFRSF13B_TNFSF13B	TNFRSF13B
TNFRSF13C_TNFSF13B	TNFSF13B
TNFRSF13C_TNFSF13B	TNFRSF13C
TNFRSF14_TNFSF14	TNFSF14
TNFRSF14_TNFSF14	TNFRSF14
TNFRSF17_TNFSF13	TNFSF13
TNFRSF17_TNFSF13	TNFRSF17
TNFRSF17_TNFSF13B	TNFSF13B
TNFRSF17_TNFSF13B	TNFRSF17
TNFRSF4_TNFSF4	TNFSF4
TNFRSF4_TNFSF4	TNFRSF4
TNFRSF9_TNFSF9	TNFSF9
TNFRSF9_TNFSF9	TNFRSF9
TNFSF10_TNFRSF10D	TNFRSF10D
TNFSF10_TNFRSF10D	TNFSF10
TNFSF11_TNFRSF11A	TNFRSF11A
TNFSF11_TNFRSF11A	TNFSF11
TNFSF12_TNFRSF12A	TNFRSF12A
TNFSF12_TNFRSF12A	TNFSF12
TNFSF8_TNFRSF8	TNFRSF8
TNFSF8_TNFRSF8	TNFSF8

## Sheet: Supplementary Table 2
Supplementary Table 2.Baseline Characteristics of Patients Included in the Study
Riaz_cohort															Lee_cohort										Abril-Rodriguez_cohort						Gide_cohort														MGH_cohort
Sample	PopCateg	Cohort	Resp_NoResp	Response	Subtype	MutationalSubtype	MStage	OS(days)	PFS(days)	PFS_event	OS_event	LRPS Score	Group 0.3803624		Pt_ID	irRC	Treatment	Overall.survival..months.	Vital.status	Resp_NoResp_ResPROG	LRPS Score	Group 0.1705247		ID	Resp_NoResp	Treatment	LRPS Score			Patient.no.	Best.RECIST.response	Sample	PREEDT	Treatment	Resp_NoResp	Age	Sex	PFS(Days)	OS(Days)	PFS_event	OS_event	LRPS Score			patient	Treatment	treatment	state	response
Pt52_On	ProgOn	NIV3-PROG	No_Response	PD	CUTANEOUS	ATripleWt	M1C	476	57	1	1	0.316232	Low		Pt_46_PROG2	PD	Pembrolizumab	26	Alive	No_Response	0.127814	Low		PT0364_tx	No_Response	Nivolumab	0.345649			13	PD	PD1_13_EDT	EDT	PD1	No_Response	68	F	82	96	1	1	0.575758			62	Pembrolizumab	PD1	ON	PD
Pt17_On	ProgOn	NIV3-PROG	No_Response	PD	CUTANEOUS	ATripleWt	M1C	57	48	1	1	0.318601	Low		Pt_30_PROG	SD	Nivolumab	11.2	Dead	No_Response	0.128885	Low		PT0112_tx	No_Response	Pembrolizumab	0.35536			9	PD	ipiPD1_9_EDT	EDT	ipiPD1	No_Response	56	M	81	156	1	1	0.580612			62	Pembrolizumab	PD1	ON	PD
Pt38_On	ProgOn	NIV3-PROG	No_Response	SD	CUTANEOUS	ATripleWt	M1C	167	167	1	1	0.319745	Low		Pt_48_PROG2	PD	Pembrolizumab	23.4	Alive	No_Response	0.13153	Low		PT0344_tx2	No_Response	Pembrolizumab	0.365196			29	SD	PD1_29_EDT	EDT	PD1	Response	66	F	335	825	1	1	0.581935			IPIPD1001	Ipilimumab + Nivolumab	IPIPD1	ON	PD
Pt9_On	NaiveOn	NIV3-NAIVE	No_Response	PD	CUTANEOUS	BRAF	M1C	92	66	1	1	0.320414	Low		Pt_31_PROG4	SD	Pembrolizumab	27.1	Dead	No_Response	0.137079	Low		PT0270_tx1	Response	Pembrolizumab	0.380164			8	PD	PD1_8_EDT	EDT	PD1	No_Response	55	M	58	58	1	1	0.595528			IPIPD1001	Ipilimumab + Nivolumab	IPIPD1	ON	PD
Pt78_On	ProgOn	NIV3-PROG	No_Response	PD	CUTANEOUS	NA	M1C	78	50	1	1	0.329864	Low		Pt_24_PROG	PR	Pembrolizumab	71.8	Alive	No_Response	0.138706	Low		PT0353_tx	No_Response	Pembrolizumab	0.385215			17	PD	PD1_17_EDT	EDT	PD1	No_Response	48	F	96	258	1	1	0.595916			IPIPD1001	Ipilimumab + Nivolumab	IPIPD1	ON	PD
Pt62_On	NaiveOn	NIV3-NAIVE	No_Response	PD	Non-CUTANEOUS	NA	M1C	472	56	1	1	0.331325	Low		Pt_31_PROG1	SD	Pembrolizumab	27.1	Dead	No_Response	0.145848	Low		PT0204_tx	No_Response	Pembrolizumab	0.38996			4	PD	ipiPD1_4_EDT	EDT	ipiPD1	No_Response	48	M	39	129	1	0	0.616499			253	Atezolizumab	PDL1	ON	PD
Pt85_On	ProgOn	NIV3-PROG	No_Response	PD	CUTANEOUS	RAS	M1A	904	49	1	0	0.333301	Low		Pt_10_PROG	CR	Pembrolizumab	66.4	Alive	No_Response	0.146668	Low		PT0375_tx	No_Response	Pembrolizumab	0.3949			1	PD	ipiPD1_1_EDT	EDT	ipiPD1	No_Response	42	F	15	689	1	0	0.621678			IPIPD1001	Ipilimumab + Nivolumab	IPIPD1	ON	PD
Pt47_On	ProgOn	NIV3-PROG	No_Response	PD	CUTANEOUS	BRAF	M1B	718	57	1	1	0.338328	Low		Pt_26_PROG	PR	Pembrolizumab	53.5	Alive	No_Response	0.151541	Low		PT0310_tx1	No_Response	Pembrolizumab	0.402831			47	PR	PD1_47_EDT	EDT	PD1	Response	24	F	1174	1174	0	0	0.630442			148	Nivolumab	PD1	ON	PD
Pt10_On	NaiveOn	NIV3-NAIVE	No_Response	SD	CUTANEOUS	NF1	M1A	256	119	1	1	0.343562	Low		Pt_52_PROG2	PD	Pembrolizumab	32	Alive	No_Response	0.152026	Low		PT0158_tx2	No_Response	Pembrolizumab	0.403827			27	CR	ipiPD1_27_EDT	EDT	ipiPD1	Response	49	M	546	546	0	0	0.637894			42	Pembrolizumab	PD1	ON	PD
Pt84_On	NaiveOn	NIV3-NAIVE	No_Response	PD	Non-CUTANEOUS	ATripleWt	M1C	151	50	1	1	0.346531	Low		Pt_25_PROG	PR	Pembrolizumab	22.2	Dead	No_Response	0.154416	Low		PT0310_tx3	Response	Pembrolizumab	0.410162			41	PR	PD1_41_EDT	EDT	PD1	Response	57	F	870	886	1	0	0.638184			IPIPD1001	Ipilimumab + Nivolumab	IPIPD1	ON	PD
Pt89_On	NaiveOn	NIV3-NAIVE	Response	SD	CUTANEOUS	ATripleWt	M1A	844	219	1	1	0.352089	Low		Pt_21_PROG	PR	Pembrolizumab	50.8	Alive	No_Response	0.154958	Low		PT0344_tx1	No_Response	Pembrolizumab	0.415731			35	CR	ipiPD1_35_EDT	EDT	ipiPD1	Response	72	M	627	627	0	0	0.639616			42	Pembrolizumab	PD1	ON	PD
Pt58_On	ProgOn	NIV3-PROG	No_Response	SD	CUTANEOUS	NF1	M1C	499	113	1	1	0.352732	Low		Pt_31_PROG2	SD	Pembrolizumab	27.1	Dead	No_Response	0.155118	Low		PT0247_tx	No_Response	Pembrolizumab	0.415867			25	PR	PD1_25_EDT	EDT	PD1	Response	67	F	271	897	1	1	0.647172			IPIPD1001	Ipilimumab + Nivolumab	IPIPD1	ON	PD
Pt13_On	NaiveOn	NIV3-NAIVE	No_Response	PD	CUTANEOUS	BRAF	NA	280	62	1	1	0.357675	Low		Pt_31_PROG3	SD	Pembrolizumab	27.1	Dead	No_Response	0.157477	Low		PT0360_tx	No_Response	Pembrolizumab	0.419149			10	PD	PD1_10_EDT	EDT	PD1	No_Response	51	M	76	551	1	0	0.656943			27	Nivolumab	PD1	ON	PD
Pt11_On	NaiveOn	NIV3-NAIVE	No_Response	PD	CUTANEOUS	BRAF	NA	837	59	1	1	0.358302	Low		Pt_52_PROG1	PD	Pembrolizumab	32	Alive	No_Response	0.16162	Low		PT0158_tx3	No_Response	Pembrolizumab	0.423031			33	PR	ipiPD1_33_EDT	EDT	ipiPD1	Response	73	M	609	609	0	0	0.663612			42	Pembrolizumab	PD1	ON	PD
Pt103_On	ProgOn	NIV3-PROG	No_Response	PD	CUTANEOUS	ATripleWt	M1B	484	50	1	0	0.358622	Low		Pt_44_PROG2	PD	Nivolumab	40.3	Alive	No_Response	0.163507	Low		PT0319_tx	No_Response	Pembrolizumab	0.44492			36	CR	ipiPD1_36_EDT	EDT	ipiPD1	Response	74	F	637	637	0	0	0.669133			99	Nivolumab	PD1	ON	PD
Pt79_On	ProgOn	NIV3-PROG	No_Response	SD	Non-CUTANEOUS	NF1	NA	218	171	1	1	0.359073	Low		Pt_53_PROG2	PD	Nivolumab	28.2	Alive	No_Response	0.164289	Low		PT0158_tx4	No_Response	Pembrolizumab	0.447869			13	PR	ipiPD1_13_EDT	EDT	ipiPD1	Response	68	F	108	357	1	1	0.670433			51	Atezolizumab	PDL1	ON	SD
Pt93_On	ProgOn	NIV3-PROG	No_Response	PD	CUTANEOUS	ATripleWt	M1C	849	51	1	0	0.360938	Low		Pt_54_PROG2	PD	Nivolumab	34.2	Alive	No_Response	0.164793	Low		PT0270_tx3	Response	Pembrolizumab	0.449706			19	SD	ipiPD1_19_EDT	EDT	ipiPD1	Response	56	M	301	635	1	0	0.674186			148	Nivolumab	PD1	ON	PD
Pt106_On	ProgOn	NIV3-PROG	No_Response	PD	Non-CUTANEOUS	BRAF	M1C	91	56	1	1	0.361034	Low		Pt_50_PROG	PD	Nivolumab	18.4	Dead	No_Response	0.166498	Low		PT0350_tx	Response	Pembrolizumab	0.454486			48	PR	PD1_48_EDT	EDT	PD1	Response	72	M	1189	1189	0	0	0.693048			39	Pembrolizumab	PD1	ON	PD
Pt8_On	NaiveOn	NIV3-NAIVE	No_Response	PD	Non-CUTANEOUS	ATripleWt	NA	259	52	1	1	0.362191	Low		Pt_49_PROG	PD	Pembrolizumab	44.5	Alive	No_Response	0.170463	Low		PT0284_tx	Response	Pembrolizumab	0.456347																		530	Pembrolizumab	PD1	ON	PR
Pt80_On	ProgOn	NIV3-PROG	No_Response	PD	_	_	_	_	_	_	_	0.363739	Low		Pt_45_RES	PD	Pembrolizumab	9.2	Dead	Response	0.170586	High		PT0294_tx2	No_Response	Pembrolizumab	0.458068																		39	Pembrolizumab	PD1	ON	PD
Pt1_On	ProgOn	NIV3-PROG	No_Response	PD	CUTANEOUS	NA	M1C	160	54	1	1	0.368701	Low		Pt_47_PROG	PD	Pembrolizumab	5.5	Dead	No_Response	0.172919	High		PT0325_tx	Response	Pembrolizumab	0.461269																		530	Pembrolizumab	PD1	ON	PR
Pt32_On	ProgOn	NIV3-PROG	No_Response	PD	CUTANEOUS	BRAF	M1C	114	57	1	0	0.369231	Low		Pt_53_RES	PD	Nivolumab	28.2	Alive	Response	0.174768	High		PT0310_tx2	Response	Pembrolizumab	0.463305																		200	Nivolumab	PDL1	ON	PR
Pt2_On	ProgOn	NIV3-PROG	No_Response	SD	Non-CUTANEOUS	NA	M1B	275	115	0	1	0.37024	Low		Pt_53_PROG1	PD	Nivolumab	28.2	Alive	No_Response	0.175511	High		PT0294_tx1	No_Response	Pembrolizumab	0.467315																		PDL002	Atezolizumab	PDL1	ON	PD
Pt26_On	ProgOn	NIV3-PROG	Response	SD	Non-CUTANEOUS	RAS	M1B	952	294	1	0	0.375202	Low		Pt_9_PROG	CR	Pembrolizumab	46.8	Alive	No_Response	0.176729	High		PT0089_tx	Response	Pembrolizumab	0.484829																		208	Pembrolizumab	PD1	ON	PD
Pt31_On	NaiveOn	NIV3-NAIVE	No_Response	PD	Non-CUTANEOUS	ATripleWt	M1A	961	50	1	0	0.378144	Low		Pt_54_PROG3	PD	Nivolumab	34.2	Alive	No_Response	0.177531	High		PT0345_tx	Response	Pembrolizumab	0.485865																		51	Atezolizumab	PDL1	ON	SD
Pt81_On	NaiveOn	NIV3-NAIVE	No_Response	PD	_	_	_	_	_	_	_	0.378327	Low		Pt_54_PROG1	PD	Nivolumab	34.2	Alive	No_Response	0.178087	High		PT0294_tx3	Response	Pembrolizumab	0.499436																		39	Pembrolizumab	PD1	ON	PD
Pt5_On	NaiveOn	NIV3-NAIVE	No_Response	PD	CUTANEOUS	ATripleWt	M1C	222	56	1	1	0.380103	Low		Pt_51_PROG	PD	Pembrolizumab	50.5	Alive	No_Response	0.184609	High		PT0349_tx	Response	Pembrolizumab	0.508872																		39	Pembrolizumab	PD1	ON	PD
Pt48_On	ProgOn	NIV3-PROG	Response	CR	CUTANEOUS	ATripleWt	M1C	1046	1046	0	0	0.380622	High		Pt_44_PROG1	PD	Nivolumab	40.3	Alive	No_Response	0.18515	High		PT0343_tx	Response	Pembrolizumab	0.516893																		39	Pembrolizumab	PD1	ON	PD
Pt94_On	NaiveOn	NIV3-NAIVE	Response	CR	CUTANEOUS	BRAF	M1C	981	729	0	0	0.381884	High		Pt_55_PROG	PD	Pembrolizumab	13.4	Dead	No_Response	0.185436	High		PT0300_tx2	No_Response	Pembrolizumab	0.54097																		98	Nivolumab	Nivolumab	ON	PR
Pt27_On	NaiveOn	NIV3-NAIVE	No_Response	PD	CUTANEOUS	BRAF	M1C	475	50	1	1	0.387739	High		Pt_48_PROG1	PD	Pembrolizumab	23.4	Alive	No_Response	0.188317	High		PT0270_tx2	Response	Pembrolizumab	0.547249																		39	Pembrolizumab	PD1	ON	PD
Pt65_On	ProgOn	NIV3-PROG	Response	SD	Non-CUTANEOUS	ATripleWt	M1B	692	280	0	0	0.388931	High		Pt_29_RES	SD	Nivolumab	29.5	Dead	Response	0.193673	High																							422	Ipilimumab + Nivolumab	IPIPD1	ON	PR
Pt109_On	ProgOn	NIV3-PROG	No_Response	PD	_	_	_	_	_	_	_	0.390403	High		Pt_22_RES	PR	Pembrolizumab	35.1	Dead	Response	0.194085	High
Pt37_On	ProgOn	NIV3-PROG	No_Response	SD	CUTANEOUS	RAS	M1A	646	176	1	1	0.390775	High		Pt_24_RES	PR	Pembrolizumab	71.8	Alive	Response	0.19824	High
Pt44_On	NaiveOn	NIV3-NAIVE	Response	PR	Non-CUTANEOUS	BRAF	NA	1093	560	1	0	0.393499	High		Pt_46_PROG1	PD	Pembrolizumab	26	Alive	No_Response	0.203929	High
Pt108_On	ProgOn	NIV3-PROG	Response	SD	Non-CUTANEOUS	ATripleWt	M1B	913	549	1	0	0.401631	High		Pt_23_RES	PR	Pembrolizumab	41.4	Alive	Response	0.218249	High
Pt98_On	ProgOn	NIV3-PROG	Response	SD	Non-CUTANEOUS	ATripleWt	M1C	747	408	1	1	0.403586	High
Pt46_On	ProgOn	NIV3-PROG	No_Response	PD	Non-CUTANEOUS	BRAF	M1A	227	51	1	1	0.40612	High
Pt28_On	NaiveOn	NIV3-NAIVE	No_Response	PD	CUTANEOUS	ATripleWt	NA	740	61	1	1	0.407294	High
Pt36_On	ProgOn	NIV3-PROG	Response	SD	CUTANEOUS	ATripleWt	M1C	1081	737	0	0	0.412541	High
Pt3_On	NaiveOn	NIV3-NAIVE	Response	PR	CUTANEOUS	RAS	NA	1144	583	1	0	0.416236	High
Pt82_On	ProgOn	NIV3-PROG	Response	SD	Non-CUTANEOUS	ATripleWt	M1C	429	220	1	1	0.416378	High
Pt4_On	NaiveOn	NIV3-NAIVE	No_Response	SD	CUTANEOUS	RAS	M1B	633	175	1	1	0.416937	High
Pt67_On	ProgOn	NIV3-PROG	Response	SD	Non-CUTANEOUS	ATripleWt	M1C	1032	281	1	0	0.422365	High
Pt87_On	NaiveOn	NIV3-NAIVE	No_Response	SD	CUTANEOUS	RAS	NA	974	108	1	0	0.422945	High
Pt105_On	ProgOn	NIV3-PROG	Response	PRCR	_	_	_	_	_	_	_	0.435171	High
Pt34_On	ProgOn	NIV3-PROG	Response	PR	CUTANEOUS	BRAF	M1B	834	834	0	0	0.445863	High
Pt92_On	ProgOn	NIV3-PROG	Response	SD	CUTANEOUS	RAS	NA	333	190	1	1	0.451199	High
Pt30_On	NaiveOn	NIV3-NAIVE	Response	CR	Non-CUTANEOUS	ATripleWt	M1A	1053	603	1	0	0.451983	High
Pt49_On	ProgOn	NIV3-PROG	Response	PR	CUTANEOUS	RAS	NA	827	827	0	0	0.452975	High
Pt35_On	NaiveOn	NIV3-NAIVE	Response	PRCR	_	_	_	_	_	_	_	0.455215	High
Pt69_On	ProgOn	NIV3-PROG	Response	PRCR	_	_	_	_	_	_	_	0.470153	High
Pt18_On	NaiveOn	NIV3-NAIVE	Response	PR	CUTANEOUS	BRAF	M1A	1073	519	1	0	0.483712	High
Pt77_On	NaiveOn	NIV3-NAIVE	No_Response	SD	CUTANEOUS	BRAF	M1A	471	163	1	1	0.499315	High
Pt101_On	ProgOn	NIV3-PROG	Response	PR	CUTANEOUS	ATripleWt	M1A	834	612	1	0	0.510283	High
[truncated: 6 more columns]

## Sheet: Supplementary Table 3
Supplementary Table 3. Predictive Performance of the LRPS Signature Across Independent Cohorts
Type	Cohort	AUC	Responder Ratio (R:NR)	Precision	sensitivity (Recall)	specificity	F1 scores
Training cohort	Riaz	0.869	21:33 (39%)	0.704	0.905	0.757576	0.792
Test cohort 1	Gide	0.87	11:7 (61%)	0.909	0.909	0.857143	0.909
Test cohort 2	Lee	0.874	6:29 (17%)	0.375	1	0.655172	0.545
Test cohort 3	MGH	0.823	5:26 (16%)	0.385	1	0.692308	0.556
Test cohort 4	Abril	0.814	13:17 (43%)	0.786	0.846	0.823529	0.815

## Sheet: Supplementary Table 4
Supplementary Table 4.Chi-Square Test Results for Association Between LPRS Signature and Clinical Variables
Comparisons of theLPRS score levels among Riaz et al cohort					Comparisons of the LPRS score levels among Gide et al cohort
	Riaz et al (N = 38 )					Gide et al (N = 17 )
	LPRS score level					LPRS score level
	Low	High	P value			Low	High	P value
Stage					Age
M1A	4	6	0.129		<60	6	4	0.137
M1B	5	3			>=60	2	6
M1C	16	4
Tumor Subtype					Sex
CUTANEOUS	20	12	0.591		Female	5	4	0.343
Non-CUTANEOUS	9	7			Male	3	6
Mutational Subtype
RAS	2	5	0.166
NF1	3	0
ATripleWt	12	8
BRAF	8	6
